# Supplementary material for: Glycolysis downregulation is a hallmark of HIV‐1 latency and sensitizes infected cells to oxidative stress
Source: PubMed Central journal article supplement (PMC8350904; doi:10.15252/emmm.202013901), 2021-07-20
Supplement: EMMM-13-e13901-s002.pdf [file EMMM-13-e13901-s002.pdf]

## Table of contents

Appendix Table S1. Microarray analysis of the effect of HIV-1 infection on gene expression in CD4<sup>+</sup> T-cells.

Appendix Table S2. Characteristics of PLWH enrolled for collection of blood used to assess the *ex-vivo* efficacy of AF and BSO.

Appendix Figure S1. Modulation of glycolytic pathway in the CD4<sup>+</sup> T-cell proteome.

Appendix Figure S2. Modulation of glycolytic pathway transcription during productive or latent HIV-1 infection of microglia.

Appendix Figure S3. Single-cell lactate level in HIV-1 infected and uninfected TZM-bl cells.

Appendix Figure S4. Single-cell lipid droplet content in HIV-1 infected and uninfected TZM-bl cells.

Appendix Figure S5. Viro-metabolic effects of exogenous Tat administration in HIV-1 infected and uninfected cells.

Appendix Figure S6. Auranofin (AF) and buthionine sulfoximine (BSO) co-treatment induces synergistic oxidative stress in U1 cells.

Appendix Figure S7. Modulation of glycolytic metabolites in cells of PLWH treated with auranofin (AF) and/or buthionine sulfoximine (BSO).

Appendix Figure S8. Gating strategy and viability of CD4<sup>+</sup> T-cells of PLWH under ART left untreated or treated with auranofin (AF) and/or buthionine sulfoximine (BSO).

Appendix Figure S9. HIV-1 reactivation in CD4<sup>+</sup> T-cells of PLWH under ART following treatment with auranofin (AF) and buthionine sulfoximine (BSO).

**Appendix Table S1. Microarray analysis of the effect of HIV-1 infection on gene expression in CD4<sup>+</sup> T-cells.** Primary CD4<sup>+</sup> T-cells were isolated from total blood of healthy individuals, activated for 72 h with  $\alpha$ -CD3-CD28 beads and infected with HIV-1<sub>pNL4-3</sub> or mock-infected. Both infected and mock-infected cells were cultured for two weeks to model different infection stages as described in (Shytaj *et al*, 2020). On days 7, 9 and 14 post-infection, HIV-1-infected and mock-infected cells were subjected to microarray analysis. Data from different time points were pooled for the analysis. Significantly enriched pathways in HIV-1 infected and mock-infected cells were identified by Gene Set Enrichment Analysis [GSEA (Subramanian *et al*, 2005)]. Number of donors = 2.

| Reactome                                                                                                 |      |             |  |
|----------------------------------------------------------------------------------------------------------|------|-------------|--|
| Gene set                                                                                                 | NES  | FDR q-value |  |
| <b>Activated in infected</b>                                                                             |      |             |  |
| CELL CYCLE                                                                                               | 8.91 | 0           |  |
| CELL CYCLE MITOTIC                                                                                       | 8.58 | 0           |  |
| DNA REPLICATION                                                                                          | 8.45 | 0           |  |
| IMMUNE SYSTEM                                                                                            | 8.04 | 0           |  |
| MITOTIC M M G1 PHASES                                                                                    | 7.70 | 0           |  |
| HIV INFECTION                                                                                            | 7.15 | 0           |  |
| S PHASE                                                                                                  | 7.01 | 0           |  |
| SYNTHESIS OF DNA                                                                                         | 6.99 | 0           |  |
| MITOTIC G1 G1 S PHASES                                                                                   | 6.84 | 0           |  |
| ADAPTIVE IMMUNE SYSTEM                                                                                   | 6.76 | 0           |  |
| MRNA PROCESSING                                                                                          | 6.71 | 0           |  |
| G1 S TRANSITION                                                                                          | 6.56 | 0           |  |
| HOST INTERACTIONS OF HIV FACTORS                                                                         | 6.49 | 0           |  |
| ORC1 REMOVAL FROM CHROMATIN                                                                              | 6.44 | 0           |  |
| ASSEMBLY OF THE PRE REPLICATIVE COMPLEX                                                                  | 6.39 | 0           |  |
| M G1 TRANSITION                                                                                          | 6.39 | 0           |  |
| PROCESSING OF CAPPED INTRON CONTAINING PRE MRNA                                                          | 6.31 | 0           |  |
| TRANSCRIPTION                                                                                            | 6.16 | 0           |  |
| METABOLISM OF RNA                                                                                        | 5.87 | 0           |  |
| INTERFERON SIGNALING                                                                                     | 5.79 | 0           |  |
| SIGNALING BY THE B CELL RECEPTOR BCR                                                                     | 5.77 | 0           |  |
| VIF MEDIATED DEGRADATION OF APOBEC3G                                                                     | 5.67 | 0           |  |
| RNA POL II TRANSCRIPTION                                                                                 | 5.65 | 0           |  |
| CYTOKINE SIGNALING IN IMMUNE SYSTEM                                                                      | 5.64 | 0           |  |
| SFSK2 MEDIATED DEGRADATION OF P27 P21                                                                    | 5.62 | 0           |  |
| CDT1 ASSOCIATION WITH THE CDC6 ORC ORIGIN COMPLEX                                                        | 5.59 | 0           |  |
| CYCLIN E ASSOCIATED EVENTS DURING G1 S TRANSITION                                                        | 5.57 | 0           |  |
| CELL CYCLE CHECKPOINTS                                                                                   | 5.55 | 0           |  |
| MRNA SPLICING                                                                                            | 5.53 | 0           |  |
| CDK MEDIATED PHOSPHORYLATION AND REMOVAL OF CDC6                                                         | 5.53 | 0           |  |
| REGULATION OF MRNA STABILITY BY PROTEINS THAT BIND AU RICH ELEMENTS                                      | 5.51 | 0           |  |
| ER PHAGOSOME PATHWAY                                                                                     | 5.44 | 0           |  |
| REGULATION OF ORNITHINE DECARBOXYLASE ODC                                                                | 5.42 | 0           |  |
| P53 DEPENDENT G1 DNA DAMAGE RESPONSE                                                                     | 5.42 | 0           |  |
| LATE PHASE OF HIV LIFE CYCLE                                                                             | 5.41 | 0           |  |
| DESTABILIZATION OF MRNA BY AUF1 HNRNP D0                                                                 | 5.38 | 0           |  |
| AUTODEGRADATION OF THE E3 UBIQUITIN LIGASE COP1                                                          | 5.29 | 0           |  |
| P53 INDEPENDENT G1 S DNA DAMAGE CHECKPOINT                                                               | 5.29 | 0           |  |
| SOF BETA TROP MEDIATED DEGRADATION OF EM1                                                                | 5.26 | 0           |  |
| MITOTIC PROMETAPHASE                                                                                     | 5.20 | 0           |  |
| ACTIVATION OF NF KAPPAB IN B CELLS                                                                       | 5.20 | 0           |  |
| HIV LIFE CYCLE                                                                                           | 5.17 | 0           |  |
| DOWNSTREAM SIGNALING EVENTS OF B CELL RECEPTOR BCR                                                       | 5.10 | 0           |  |
| REGULATION OF MITOTIC CELL CYCLE                                                                         | 5.07 | 0           |  |
| CROSS PRESENTATION OF SOLUBLE EXOGENOUS ANTIGENS ENDOSOMES                                               | 5.02 | 0           |  |
| ANTIVIRAL MECHANISM BY IFN STIMULATED GENES                                                              | 4.98 | 0           |  |
| APOPTOSIS                                                                                                | 4.94 | 0           |  |
| ANTIGEN PROCESSING CROSS PRESENTATION                                                                    | 4.93 | 0           |  |
| APC C CDH1 MEDIATED DEGRADATION OF CDC20 AND OTHER APC C CDH1 TARGETED PROTEINS IN LATE MITOSIS EARLY G1 | 4.88 | 0           |  |
| REGULATION OF APOPTOSIS                                                                                  | 4.84 | 0           |  |
| SIGNALING BY WNT                                                                                         | 4.82 | 0           |  |
| METABOLISM OF PROTEINS                                                                                   | 4.80 | 0           |  |
| CLASS I MHC MEDIATED ANTIGEN PROCESSING PRESENTATION                                                     | 4.79 | 0           |  |
| AUTODEGRADATION OF CDH1 BY CDH1 APC C                                                                    | 4.70 | 0           |  |
| APC C CDC20 MEDIATED DEGRADATION OF MITOTIC PROTEINS                                                     | 4.65 | 0           |  |
| METABOLISM OF MRNA                                                                                       | 4.62 | 0           |  |
| ANTIGEN PROCESSING UBIQUITINATION PROTEASOME DEGRADATION                                                 | 4.61 | 0           |  |
| TRANSPORT OF MATURE TRANSCRIPT TO CYTOPLASM                                                              | 4.59 | 0           |  |
| RNA POL I RNA POL III AND MITOCHONDRIAL TRANSCRIPTION                                                    | 4.38 | 0           |  |
| FORMATION OF RNA POL II ELONGATION COMPLEX                                                               | 4.33 | 0           |  |
| METABOLISM OF NON CODING RNA                                                                             | 4.30 | 0           |  |
| DNA REPAIR                                                                                               | 4.20 | 0           |  |
| UNFOLDED PROTEIN RESPONSE                                                                                | 4.19 | 0           |  |
| TRANSPORT OF MATURE MRNA DERIVED FROM AN INTRONLESS TRANSCRIPT                                           | 4.15 | 0           |  |
| RNA POL II PRE TRANSCRIPTION EVENTS                                                                      | 4.15 | 0           |  |
| CLEAVAGE OF GROWING TRANSCRIPT IN THE TERMINATION REGION                                                 | 4.09 | 0           |  |
| FORMATION OF THE HIV1 EARLY ELONGATION COMPLEX                                                           | 4.02 | 0           |  |
| CHROMOSOME MAINTENANCE                                                                                   | 4.02 | 0           |  |
| MITOTIC G2 G2 M PHASES                                                                                   | 3.99 | 0           |  |
| TCA CYCLE AND RESPIRATORY ELECTRON TRANSPORT                                                             | 3.94 | 0           |  |
| CHEMOSMOTIC COUPLING AND HEAT PRODUCTION BY UNCOUPLING PROTEINS                                          | 3.89 | 0           |  |
| RESPIRATORY ELECTRON TRANSPORT                                                                           | 3.85 | 0           |  |
| METABOLISM OF AMINO ACIDS AND DERIVATIVES                                                                | 3.82 | 0           |  |
| DIABETES PATHWAYS                                                                                        | 3.82 | 0           |  |
| DNA STRAND ELONGATION                                                                                    | 3.77 | 0           |  |
| MITOCHONDRIAL PROTEIN IMPORT                                                                             | 3.75 | 0           |  |
| MRNA CAPPING                                                                                             | 3.73 | 0           |  |

| Biocarta                     |      |             |  |
|------------------------------|------|-------------|--|
| Gene set                     | NES  | FDR q-value |  |
| <b>Activated in infected</b> |      |             |  |
| PROTEASOME PATHWAY           | 4.67 | 0           |  |
| CELLCYCLE PATHWAY            | 3.39 | 0           |  |
| CASPASE PATHWAY              | 3.16 | 0           |  |
| MCM PATHWAY                  | 2.92 | 0           |  |
| HVNEF PATHWAY                | 2.72 | 0.0005      |  |
| FAS PATHWAY                  | 2.51 | 0.0018      |  |
| RANMS PATHWAY                | 2.53 | 0.0019      |  |
| ATRRCA PATHWAY               | 2.54 | 0.0022      |  |
| FCER1 PATHWAY                | 2.58 | 0.0023      |  |
| BCELL SURVIVAL PATHWAY       | 2.34 | 0.0063      |  |
| G1 PATHWAY                   | 2.35 | 0.0065      |  |
| PGCIA PATHWAY                | 2.37 | 0.0068      |  |
| MITOCHONDRIA PATHWAY         | 2.35 | 0.0071      |  |
| RACVCD PATHWAY               | 2.37 | 0.0073      |  |
| MAPK PATHWAY                 | 2.30 | 0.0076      |  |
| G2 PATHWAY                   | 2.27 | 0.0080      |  |
| DNAFRAGMENT PATHWAY          | 2.27 | 0.0084      |  |
| CHEMICAL PATHWAY             | 2.27 | 0.0088      |  |
| BCR PATHWAY                  | 2.27 | 0.0092      |  |
| HDAC PATHWAY                 | 2.22 | 0.0096      |  |
| EIF2 PATHWAY                 | 2.22 | 0.0099      |  |
| NKDYNAMIN PATHWAY            | 2.17 | 0.0102      |  |
| RHO PATHWAY                  | 2.19 | 0.0102      |  |
| MPR PATHWAY                  | 2.18 | 0.0105      |  |
| MEF2D PATHWAY                | 2.17 | 0.0105      |  |
| SRCRPTP PATHWAY              | 2.18 | 0.0106      |  |
| DEATH PATHWAY                | 2.13 | 0.0114      |  |
| SET PATHWAY                  | 2.12 | 0.0116      |  |
| SKP2ZF PATHWAY               | 2.08 | 0.0148      |  |
| TNFR1 PATHWAY                | 2.06 | 0.0166      |  |
| P3SALZHEIMERS PATHWAY        | 2.03 | 0.0188      |  |
| PTDINS PATHWAY               | 2.02 | 0.0193      |  |
| RNA PATHWAY                  | 2.01 | 0.0199      |  |
| D4GD1 PATHWAY                | 1.97 | 0.0245      |  |
| P27 PATHWAY                  | 1.95 | 0.0270      |  |
| RB PATHWAY                   | 1.94 | 0.0272      |  |
| ERKS PATHWAY                 | 1.93 | 0.0273      |  |
| PTC1 PATHWAY                 | 1.95 | 0.0275      |  |
| MTOR PATHWAY                 | 1.94 | 0.0275      |  |
| P53HYPOXIA PATHWAY           | 1.93 | 0.0278      |  |
| VDR PATHWAY                  | 1.87 | 0.0356      |  |
| AKAP95 PATHWAY               | 1.87 | 0.0358      |  |
| CYTOKINE PATHWAY             | 1.87 | 0.0364      |  |
| MCALPAIN PATHWAY             | 1.86 | 0.0367      |  |
| NFAT PATHWAY                 | 1.86 | 0.0368      |  |
| ETC PATHWAY                  | 1.85 | 0.0371      |  |
| GCR PATHWAY                  | 1.84 | 0.0390      |  |
| CARM ER PATHWAY              | 1.82 | 0.0424      |  |
| FMLP PATHWAY                 | 1.81 | 0.0434      |  |
| EIF PATHWAY                  | 1.81 | 0.0435      |  |
| IL3 PATHWAY                  | 1.81 | 0.0437      |  |
| BLYMPHOCYTE PATHWAY          | 1.79 | 0.0472      |  |

| Gene set                                                                                                                                                            | NES   | FDR q-value |
|---------------------------------------------------------------------------------------------------------------------------------------------------------------------|-------|-------------|
| <b>Activated in Mock</b>                                                                                                                                            |       |             |
| 3 UTR MEDIATED TRANSLATIONAL REGULATION                                                                                                                             | -5.75 | 0           |
| PEPTIDE CHAIN ELONGATION                                                                                                                                            | -5.54 | 0           |
| TRANSLATION                                                                                                                                                         | -5.40 | 0           |
| SRP DEPENDENT COTRANSLATIONAL PROTEIN TARGETING TO MEMBRANE                                                                                                         | -4.97 | 0           |
| NONSENSE MEDIATED DECAY ENHANCED BY THE EXON JUNCTION COMPLEX                                                                                                       | -4.84 | 0           |
| INFLUENZA VIRAL RNA TRANSCRIPTION AND REPLICATION                                                                                                                   | -4.76 | 0           |
| INFLUENZA LIFE CYCLE                                                                                                                                                | -3.79 | 0           |
| ACTIVATION OF THE NFKB UPON BINDING OF THE IKB BINDING COMPLEX AND EIFS AND SUBSEQUENT BINDING TO FORMATION OF THE TERNARY COMPLEX AND SUBSEQUENTLY THE 43S COMPLEX | -3.78 | 0           |
| OLFACTORY SIGNALING PATHWAY                                                                                                                                         | -3.19 | 0           |
| GENERIC TRANSCRIPTION PATHWAY                                                                                                                                       | -3.17 | 0           |
| GPCR DOWNSTREAM SIGNALING                                                                                                                                           | -2.72 | 0.0006      |
| TCR SIGNALING                                                                                                                                                       | -2.68 | 0.0007      |
| GENERATION OF SECOND MESSENGER MOLECULES                                                                                                                            | -2.46 | 0.0033      |
| GLYCOLYSIS                                                                                                                                                          | -2.38 | 0.0055      |
| BINDING AND ENTRY OF HIV VIRION                                                                                                                                     | -2.14 | 0.0268      |
| PROTEOLYTIC CLEAVAGE OF SNARE COMPLEX PROTEINS                                                                                                                      | -2.06 | 0.0440      |
| HS GAG DEGRADATION                                                                                                                                                  | -2.05 | 0.0445      |

| Gene set                 | NES   | FDR q-value |
|--------------------------|-------|-------------|
| <b>Activated in Mock</b> |       |             |
| IL10 PATHWAY             | -2.76 | 0.0014      |
| PDGF PATHWAY             | -2.36 | 0.0116      |
| EGF PATHWAY              | -2.36 | 0.0174      |
| TCRA PATHWAY             | -2.15 | 0.0323      |
| RELA PATHWAY             | -2.05 | 0.0336      |
| IL7 PATHWAY              | -2.09 | 0.0347      |
| IL2 PATHWAY              | -2.10 | 0.0365      |
| TCAPPTOSIS PATHWAY       | -2.05 | 0.0365      |
| TCR PATHWAY              | -2.15 | 0.0402      |
| GLYCOLYSIS PATHWAY       | -1.98 | 0.0457      |

|                                                                                          |      |          |
|------------------------------------------------------------------------------------------|------|----------|
| NEP NS2 INTERACTS WITH THE CELLULAR EXPORT MACHINERY                                     | 3.66 | 0        |
| TRANSPORT OF RIBONUCLEOPROTEINS INTO THE HOST NUCLEUS                                    | 3.65 | 0        |
| INTERFERON ALPHA BETA SIGNALING                                                          | 3.64 | 0        |
| INTERACTIONS OF VPR WITH HOST CELLULAR PROTEINS                                          | 3.60 | 0        |
| MRNA SPLICING MINOR PATHWAY                                                              | 3.54 | 0        |
| TRNA AMINOACYLATION                                                                      | 3.53 | 0        |
| TRANSCRIPTION COUPLED NER TC NER                                                         | 3.45 | 0        |
| MHC CLASS II ANTIGEN PRESENTATION                                                        | 3.44 | 0        |
| MRNA 3 END PROCESSING                                                                    | 3.43 | 0        |
| PROTEIN FOLDING                                                                          | 3.43 | 0        |
| RECRUITMENT OF MITOTIC CENTROSOME PROTEINS AND COMPLEXES                                 | 3.41 | 0        |
| ELONGATION ARREST AND RECOVERY                                                           | 3.40 | 0        |
| PROCESSING OF CAPPED INTRONLESS PRE MRNA                                                 | 3.40 | 0        |
| MICRORNA MRNA BIOGENESIS                                                                 | 3.38 | 0        |
| ACTIVATION OF THE PRE REPLICATIVE COMPLEX                                                | 3.36 | 0        |
| CHOLESTEROL BIOSYNTHESIS                                                                 | 3.32 | 0        |
| SIGNALING BY NGF                                                                         | 3.30 | 0        |
| ABORTIVE ELONGATION OF HIV1 TRANSCRIPT IN THE ABSENCE OF TAT                             | 3.27 | 0        |
| RNA POL II TRANSCRIPTION PRE INITIATION AND PROMOTER OPENING                             | 3.27 | 0        |
| RNA POL III TRANSCRIPTION                                                                | 3.25 | 0        |
| NUCLEOTIDE EXCISION REPAIR                                                               | 3.23 | 0        |
| ACTIVATION OF CHAPERONE GENES BY XBP1S                                                   | 3.23 | 0        |
| EXTENSION OF TELOMERES                                                                   | 3.22 | 0        |
| INTRINSIC PATHWAY FOR APOPTOSIS                                                          | 3.22 | 0        |
| RNA POL III TRANSCRIPTION INITIATION FROM TYPE 3 PROMOTER                                | 3.21 | 0        |
| RNA POL I TRANSCRIPTION                                                                  | 3.21 | 0        |
| RNA POL III TRANSCRIPTION INITIATION FROM TYPE 2 PROMOTER                                | 3.18 | 0        |
| PREFOLDIN MEDIATED TRANSFER OF SUBSTRATE TO CCT TRIC                                     | 3.16 | 0        |
| ACTIVATION OF ATR IN RESPONSE TO REPLICATION STRESS                                      | 3.15 | 0        |
| REGULATION OF GLUCOKINASE BY GLUCOKINASE REGULATORY PROTEIN                              | 3.14 | 0        |
| LOSS OF NLP FROM MITOTIC CENTROSOMES                                                     | 3.14 | 0        |
| TELOMERE MAINTENANCE                                                                     | 3.12 | 0        |
| REGULATORY RNA PATHWAYS                                                                  | 3.09 | 0        |
| CYTOSOLIC TRNA AMINOACYLATION                                                            | 3.08 | 0        |
| G2 AND EARLY G1                                                                          | 3.06 | 0        |
| E2F MEDIATED REGULATION OF DNA REPLICATION                                               | 3.04 | 0        |
| SIGNALING BY EGFR IN CANCER                                                              | 3.03 | 0        |
| MEIOSIS                                                                                  | 3.01 | 0        |
| RNA POL III TRANSCRIPTION TERMINATION                                                    | 3.00 | 0        |
| RNA POL III CHAIN ELONGATION                                                             | 2.99 | 0        |
| UNWINDING OF DNA                                                                         | 2.90 | 2.24E-05 |
| ASSOCIATION OF TRIC CCT WITH TARGET PROTEINS DURING BIOSYNTHESIS                         | 2.92 | 2.26E-05 |
| G2 M CHECKPOINTS                                                                         | 2.95 | 2.28E-05 |
| ANTIGEN ACTIVATES B CELL RECEPTOR LEADING TO GENERATION OF SECOND MESSENGERS             | 2.83 | 3.24E-05 |
| INTERFERON GAMMA SIGNALING                                                               | 2.86 | 3.27E-05 |
| METABOLISM OF LIPIDS AND LIPOPROTEINS                                                    | 2.88 | 3.30E-05 |
| AMINO ACID SYNTHESIS AND INTERCONVERSION                                                 | 2.88 | 3.32E-05 |
| MEMBRANE TRAFFICKING                                                                     | 2.88 | 3.35E-05 |
| FORMATION OF TUBULIN FOLDING INTERMEDIATES BY CCT TRIC                                   | 2.81 | 5.46E-05 |
| RNA POL I TRANSCRIPTION TERMINATION                                                      | 2.77 | 6.54E-05 |
| DEPOSITION OF NEW CENPA CONTAINING NUCLEOSOMES AT THE CENTROMERE                         | 2.76 | 8.69E-05 |
| MEIOTIC RECOMBINATION                                                                    | 2.71 | 1.07E-04 |
| PROCESSING OF INTRONLESS PRE MRNAS                                                       | 2.73 | 1.08E-04 |
| ASPARAGINE N LINKED GLYCOSYLATION                                                        | 2.68 | 1.14E-04 |
| NGF SIGNALING VIA TRKA FROM THE PLASMA MEMBRANE                                          | 2.70 | 1.15E-04 |
| IMMUNOREGULATORY INTERACTIONS BETWEEN A LYMPHOID AND A NON LYMPHOID CELL                 | 2.70 | 1.16E-04 |
| RNA POL I TRANSCRIPTION INITIATION                                                       | 2.70 | 1.17E-04 |
| G1 PHASE                                                                                 | 2.68 | 1.23E-04 |
| FORMATION OF TRANSCRIPTION COUPLED NER TC NER REPAIR COMPLEX                             | 2.67 | 1.33E-04 |
| GLOBAL GENOMIC NER GG NER                                                                | 2.65 | 1.62E-04 |
| GLUCOSE TRANSPORT                                                                        | 2.64 | 2.01E-04 |
| LAGGING STRAND SYNTHESIS                                                                 | 2.62 | 2.67E-04 |
| REPAIR SYNTHESIS FOR GAP FILLING BY DNA POL IN TC NER                                    | 2.62 | 2.75E-04 |
| VITAMIN B5 PANTOTHENATE METABOLISM                                                       | 2.61 | 2.84E-04 |
| G1 S SPECIFIC TRANSCRIPTION                                                              | 2.56 | 3.70E-04 |
| VIRAL MESSENGER RNA SYNTHESIS                                                            | 2.53 | 4.34E-04 |
| LINKED OLIGOSACCHARIDE LLO AND TRANSFER TO A NASCENT PROTEIN                             | 2.53 | 4.47E-04 |
| PERK REGULATED GENE EXPRESSION                                                           | 2.53 | 4.50E-04 |
| ACTIVATION OF BH3 ONLY PROTEINS                                                          | 2.50 | 5.40E-04 |
| SIGNALING BY SCF KIT                                                                     | 2.50 | 5.64E-04 |
| DESTABILIZATION OF MRNA BY XSRP                                                          | 2.49 | 5.76E-04 |
| SLBP DEPENDENT PROCESSING OF REPLICATION DEPENDENT HISTONE PRE MRNAS                     | 2.49 | 5.82E-04 |
| SIGNALING BY ILS                                                                         | 2.48 | 6.14E-04 |
| TOLL RECEPTOR CASCADES                                                                   | 2.47 | 6.84E-04 |
| NUCLEOTIDE BINDING DOMAIN LEUCINE RICH REPEAT CONTAINING RECEPTOR NLR SIGNALING PATHWAYS | 2.46 | 6.74E-04 |
| SIGNALING BY ERBB2                                                                       | 2.46 | 6.79E-04 |
| MRNA DECAY BY 3 TO 5 EXORIBONUCLEASE                                                     | 2.45 | 7.06E-04 |
| TRAF3 DEPENDENT IRF ACTIVATION PATHWAY                                                   | 2.45 | 7.10E-04 |
| CYCLIN A B1 ASSOCIATED EVENTS DURING G2 M TRANSITION                                     | 2.44 | 7.49E-04 |
| POL SWITCHING                                                                            | 2.43 | 8.51E-04 |



|                                                                                                |      |          |
|------------------------------------------------------------------------------------------------|------|----------|
| FACTORS INVOLVED IN MEGAKARYOCYTE DEVELOPMENT AND PLATELET PRODUCTION                          | 2.42 | 9.34E-04 |
| TRIGLYCERIDE BIOSYNTHESIS                                                                      | 2.40 | 0.0010   |
| POST TRANSLATIONAL PROTEIN MODIFICATION                                                        | 2.37 | 0.0014   |
| METABOLISM OF CARBOHYDRATES                                                                    | 2.36 | 0.0014   |
| NEGATIVE REGULATORS OF RIG I MDA5 SIGNALING                                                    | 2.36 | 0.0014   |
| DEADENYLATION DEPENDENT MRNA DECAY                                                             | 2.34 | 0.0016   |
| HEMOSTASIS                                                                                     | 2.30 | 0.0021   |
| DARPP 32 EVENTS                                                                                | 2.30 | 0.0021   |
| MITOCHONDRIAL TRNA AMINOACYLATION                                                              | 2.30 | 0.0021   |
| FATTY ACID TRIACYLGLYCEROL AND KETONE BODY METABOLISM                                          | 2.29 | 0.0022   |
| DOUBLE STRAND BREAK REPAIR                                                                     | 2.29 | 0.0022   |
| RECYCLING PATHWAY OF L1                                                                        | 2.29 | 0.0022   |
| CITRIC ACID CYCLE TCA CYCLE                                                                    | 2.28 | 0.0023   |
| PURINE RIBONUCLEOSIDE MONOPHOSPHATE BIOSYNTHESIS                                               | 2.28 | 0.0024   |
| MEIOTIC SYNAPSIS                                                                               | 2.26 | 0.0027   |
| GAB1 SIGNALOSOME                                                                               | 2.24 | 0.0030   |
| INNATE IMMUNE SYSTEM                                                                           | 2.25 | 0.0030   |
| NRAGE SIGNALS DEATH THROUGH JNK                                                                | 2.23 | 0.0034   |
| ACTIVATION OF GENES BY ATF4                                                                    | 2.22 | 0.0036   |
| DOWNSTREAM SIGNAL TRANSDUCTION                                                                 | 2.22 | 0.0036   |
| REMOVAL OF THE FLAP INTERMEDIATE FROM THE C STRAND                                             | 2.17 | 0.0048   |
| DESTABILIZATION OF MRNA BY TRISTETRAPROLIN TTP                                                 | 2.17 | 0.0050   |
| TRAF6 MEDIATED IRF7 ACTIVATION IN TLR7 8 OR 9 SIGNALING                                        | 2.16 | 0.0050   |
| RNA POL I PROMOTER OPENING                                                                     | 2.14 | 0.0056   |
| P75 NTR RECEPTOR MEDIATED SIGNALLING                                                           | 2.14 | 0.0057   |
| SIGNALING BY FGFR                                                                              | 2.13 | 0.0060   |
| PROGRESSIVE SYNTHESIS ON THE LAGGING STRAND                                                    | 2.12 | 0.0062   |
| SHC1 EVENTS IN EGFR SIGNALING                                                                  | 2.12 | 0.0063   |
| CD28 CO STIMULATION                                                                            | 2.12 | 0.0066   |
| NOD1 2 SIGNALING PATHWAY                                                                       | 2.10 | 0.0072   |
| TRIF MEDIATED TLR3 SIGNALING                                                                   | 2.10 | 0.0073   |
| DESTABILIZATION OF MRNA BY BRP1                                                                | 2.10 | 0.0074   |
| FANCONI ANEMIA PATHWAY                                                                         | 2.09 | 0.0077   |
| TRANS GOLGI NETWORK VESICLE BUDDING                                                            | 2.04 | 0.0101   |
| OPIOID SIGNALING                                                                               | 2.04 | 0.0108   |
| COSTIMULATION BY THE CD28 FAMILY                                                               | 2.03 | 0.0112   |
| RIG I MDA5 MEDIATED INDUCTION OF IFN ALPHA BETA PATHWAYS                                       | 2.02 | 0.0115   |
| NFKB ACTIVATION THROUGH FADD RIP1 PATHWAY MEDIATED BY CASPASE 8 AND10                          | 2.00 | 0.0127   |
| IL 2 SIGNALING                                                                                 | 1.99 | 0.0139   |
| ACTIVATED TLR4 SIGNALING                                                                       | 1.98 | 0.0143   |
| ACTIVATION OF CHAPERONES BY ATF6 ALPHA                                                         | 1.98 | 0.0143   |
| PRE NOTCH EXPRESSION AND PROCESSING                                                            | 1.97 | 0.0147   |
| SIGNALING BY FGFR IN DISEASE                                                                   | 1.97 | 0.0150   |
| METABOLISM OF NUCLEOTIDES                                                                      | 1.96 | 0.0160   |
| PI METABOLISM                                                                                  | 1.95 | 0.0162   |
| CHEMOKINE RECEPTORS BIND CHEMOKINES                                                            | 1.95 | 0.0162   |
| CCO6 ASSOCIATION WITH THE ORC ORIGIN COMPLEX                                                   | 1.95 | 0.0166   |
| IL RECEPTOR SHC SIGNALING                                                                      | 1.94 | 0.0172   |
| NEF MEDIATES DOWN MODULATION OF CELL SURFACE RECEPTORS BY RECRUITING THEM TO CLATHRIN ADAPTERS | 1.93 | 0.0175   |
| LYSOSOME VESICLE BIOGENESIS                                                                    | 1.93 | 0.0184   |
| SIGNALING TO RAS                                                                               | 1.92 | 0.0194   |
| SOS MEDIATED SIGNALLING                                                                        | 1.91 | 0.0204   |
| SIGNALING BY GPCR                                                                              | 1.90 | 0.0207   |
| RESOLUTION OF AP SITES VIA THE MULTIPLE NUCLEOTIDE PATCH REPLACEMENT PATHWAY                   | 1.90 | 0.0210   |
| APOPTOSIS INDUCED DNA FRAGMENTATION                                                            | 1.90 | 0.0212   |
| PIP3 ACTIVATES AKT SIGNALING                                                                   | 1.89 | 0.0213   |
| GOLGI ASSOCIATED VESICLE BIOGENESIS                                                            | 1.89 | 0.0213   |
| SLC MEDIATED TRANSMEMBRANE TRANSPORT                                                           | 1.89 | 0.0216   |
| IL 3 5 AND GM CSF SIGNALING                                                                    | 1.89 | 0.0217   |
| TRANSPORT OF INORGANIC CATIONS ANIONS AND AMINO ACIDS OLIGOPEPTIDES                            | 1.88 | 0.0227   |
| SHC MEDIATED SIGNALING                                                                         | 1.88 | 0.0228   |
| CELL DEATH SIGNALING VIA NRAGE NRIF AND NADE                                                   | 1.87 | 0.0240   |
| DOWNSTREAM SIGNALING OF ACTIVATED FGFR                                                         | 1.87 | 0.0243   |
| SYNTHESIS OF PA                                                                                | 1.86 | 0.0245   |
| THE NLRP3 INFLAMMASOME                                                                         | 1.84 | 0.0267   |
| TRAF6 MEDIATED INDUCTION OF NFKB AND MAP KINASES UPON TLR7 8 OR 9 ACTIVATION                   | 1.84 | 0.0272   |
| ENDOSOMAL SORTING COMPLEX REQUIRED FOR TRANSPORT ESCRT                                         | 1.82 | 0.0295   |
| ACETYLCHOLINE BINDING AND DOWNSTREAM EVENTS                                                    | 1.81 | 0.0312   |
| SIGNALING BY PDGF                                                                              | 1.81 | 0.0325   |
| MRNA DECAY BY 5 TO 3 EXORIBONUCLEASE                                                           | 1.80 | 0.0336   |
| SIGNALING BY ERBB4                                                                             | 1.79 | 0.0344   |
| TRAF6 MEDIATED NFKB ACTIVATION                                                                 | 1.79 | 0.0345   |
| PHOSPHOLIPID METABOLISM                                                                        | 1.79 | 0.0345   |
| PEROXISOMAL LIPID METABOLISM                                                                   | 1.79 | 0.0345   |
| DEVELOPMENTAL BIOLOGY                                                                          | 1.79 | 0.0346   |
| EGFR DOWNREGULATION                                                                            | 1.78 | 0.0358   |
| GAP JUNCTION TRAFFICKING                                                                       | 1.78 | 0.0362   |
| PACKAGING OF TELOMERE ENDS                                                                     | 1.77 | 0.0373   |
| GLUCURONIDATION                                                                                | 1.77 | 0.0383   |
| G ALPHA1213 SIGNALING EVENTS                                                                   | 1.76 | 0.0392   |

|                                                     |      |        |
|-----------------------------------------------------|------|--------|
| PSBMMPK EVENTS                                      | 1.76 | 0.0400 |
| HOMOLOGOUS RECOMBINATION REPAIR OF REPLICATION      |      |        |
| INDEPENDENT DOUBLE STRAND BREAKS                    | 1.76 | 0.0402 |
| ASSOCIATION OF LICENSING FACTORS WITH THE PRE       |      |        |
| REPLICATIVE COMPLEX                                 | 1.75 | 0.0413 |
| TETRAHYDROBIOPTERIN BH4 SYNTHESIS RECYCLING SALVAGE |      |        |
| AND REGULATION                                      | 1.75 | 0.0414 |
| CELL CELL JUNCTION ORGANIZATION                     | 1.75 | 0.0417 |
| INTEGRIN CELL SURFACE INTERACTIONS                  | 1.74 | 0.0417 |
| SPRY REGULATION OF FGF SIGNALING                    | 1.74 | 0.0422 |
| FORMATION OF INCISION COMPLEX IN GG-NER             | 1.74 | 0.0424 |
| INTEGRIN ALPHA11B BETA3 SIGNALING                   | 1.74 | 0.0426 |
| FATTY ACYL COA BIOSYNTHESIS                         | 1.74 | 0.0427 |
| SHC1 EVENTS IN ERBB4 SIGNALING                      | 1.73 | 0.0430 |
| AMYLOIDS                                            | 1.72 | 0.0450 |
| TRANSMEMBRANE TRANSPORT OF SMALL MOLECULES          | 1.72 | 0.0451 |
| ENOS ACTIVATION AND REGULATION                      | 1.72 | 0.0452 |
| EXTRACELLULAR MATRIX ORGANIZATION                   | 1.72 | 0.0453 |
| MAP KINASE ACTIVATION IN TLR CASCADE                | 1.72 | 0.0458 |
| SYNTHESIS OF SUBSTRATES IN N GLYCAN BIOSYNTHESIS    | 1.71 | 0.0480 |
| SIGNALING TO ERKS                                   | 1.70 | 0.0492 |
| COPI MEDIATED TRANSPORT                             | 1.70 | 0.0492 |

Appendix Table S1

**Appendix Table S2. Characteristics of PLWH enrolled for collection of blood used to assess the *ex-vivo* efficacy of AF and BSO.**

| Patient ID | Age at sampling | Sex | Stage in which treatment was initiated | Number of years from diagnosis until sampling | Type of ART at initiation (NRTI + protease inhibitor or NNRTI) | CD4 count | Viremia | CD4/CD8 ratio |
|------------|-----------------|-----|----------------------------------------|-----------------------------------------------|----------------------------------------------------------------|-----------|---------|---------------|
| donor 1    | 52.2            | F   | A2, Treated undetectable               | 24.41                                         | AZT                                                            | 657       | <20     | 1.07          |
| donor 2    | 41.1            | M   | A3, Treated undetectable               | 15.88                                         | Retrovir - Inivirase - Viracept                                | 323       | <20     | 1.03          |
| donor 3    | 34              | F   | B1, Treated undetectable               | 0.18                                          | Dolutegravir/Abacavir/Lamivudine                               | 972       | <20     | 0.97          |
| donor 4    | 38              | M   | C3, Treated undetectable               | 5.7                                           | Efavirenz/Emtricitabine/Tenofovir                              | 235       | <20     | 0.209         |
| donor 5    | 58.3            | M   | B3, Treated undetectable               | 13.35                                         | AZT-3TC-EFV                                                    | 664       | 22      | 0.68          |
| donor 6    | 43.6            | F   | B2, Treated undetectable               | 11.85                                         | Lamivudin + Lopinavir/Ritonavir + Abacavir                     | 1114      | <20     | 1.37          |
| donor 7    | 49.5            | M   | A3, Treated undetectable               | 9.16                                          | AZT + 3TC + EFV                                                | 543       | <20     | 0.71          |
| donor 8    | 27.7            | F   | C3, Treated undetectable               | 8.03                                          | Emtricitabine/tenofovir, Nevirapine                            | 481       | <20     | 1.1           |

Appendix Table S2

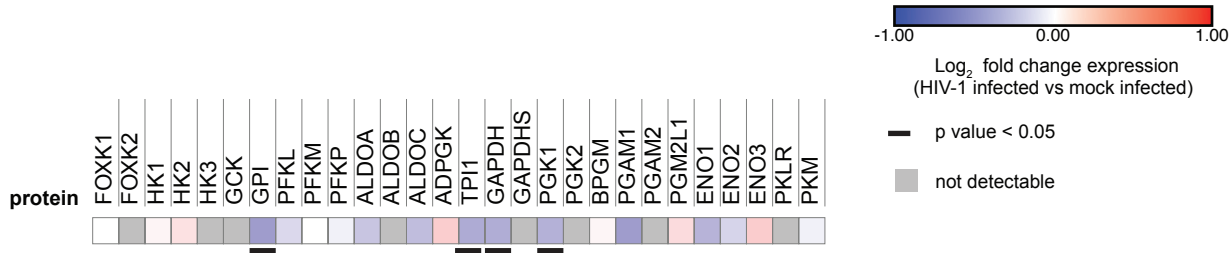

**Appendix Figure S1**

**Appendix Figure S1. Modulation of glycolytic pathway in the CD4<sup>+</sup> T-cell proteome.** Heatmap of the expression of the glycolytic pathway in HIV-1 infected vs mock-infected cells. Cells were activated for 72 h with  $\alpha$ -CD3-CD28 beads and infected with HIV-1<sub>pNL4-3</sub> or mock-infected. Both infected and mock-infected cells were cultured for two weeks to model different infection stages as described in (Shytaj *et al*, 2020). On days 3, 7, 9 and 14 post-infection, HIV-1 infected and mock-infected cells were subjected to proteomic analysis (Shytaj *et al*, 2020). Data were analyzed by Student's t-test after pooling the different time points.

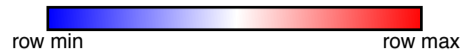

not detectable

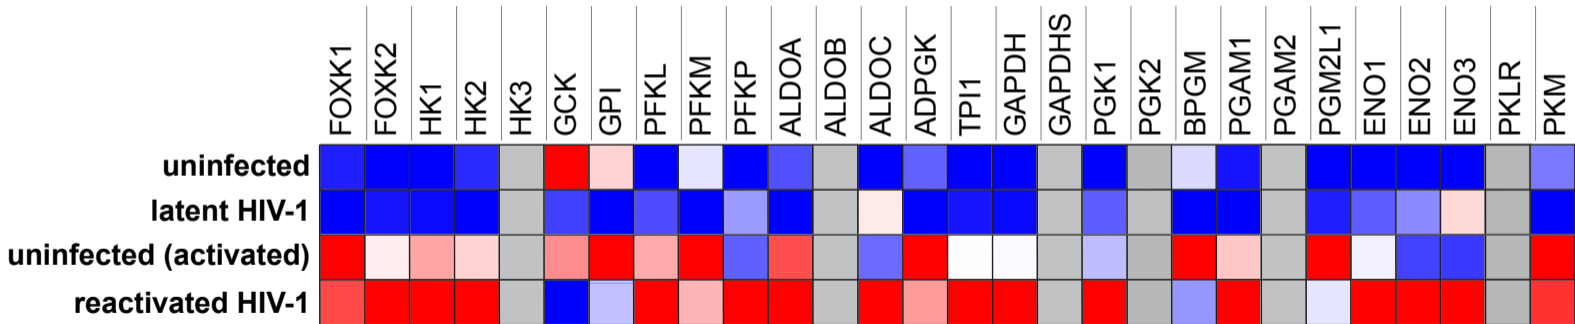

**Appendix Figure S2**

**Appendix Figure S2. Modulation of glycolytic pathway transcription during productive or latent HIV-1 infection of microglia.** Heatmap of the relative gene expression of the glycolytic pathway in C20/HC69 microglial cells (Garcia-Mesa *et al*, 2017) is shown. Microglial cells were subjected to RNA-Seq analysis under four conditions: uninfected (C20), uninfected and activated (C20-TNF), latently HIV-1 infected (HC69) and reactivated HIV-1 infection (HC69-TNF). Expression data were analyzed by Deseq2 (Love *et al*, 2014).



**A**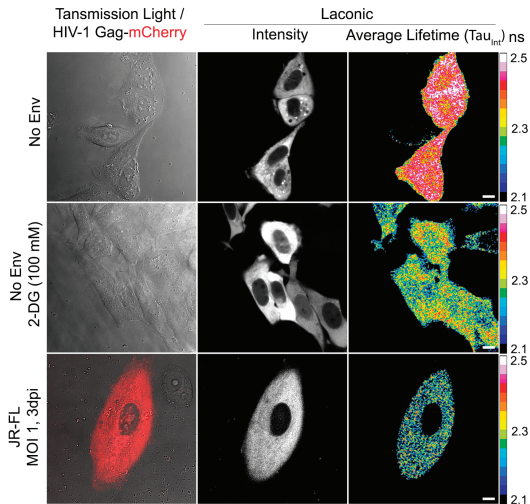**B**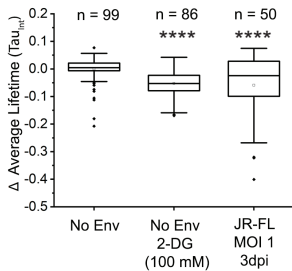

**Appendix Figure S3. Single-cell lactate level in HIV-1 infected and uninfected TZM-bl cells.** Panel A) micrograph showing TZM-bl cells expressing Laconic FRET-based biosensor infected with HIV-1 Gag-mCherry pseudoviruses (No Env or JR-FL Env, as indicated), in the absence or presence of the glycolysis inhibitor D-deoxy D-glucose (2-DG). Left column: merge of transmission light image and Gag-mCherry fluorescence showing TZM-bl cells negative (-mCherry) or positive for HIV-1 infection (+mCherry). Middle column: intensity image of Laconic fluorescence. Right column: pixel-by-pixel average lifetime (TauInt) image of Laconic expressing cells represented in 16-colors Look-up Table (LUT). Calibration color bar shows values from 2.1 to 2.5 ns. Scale bar = 10  $\mu\text{m}$ . Panel B) Box and whisker plot showing results from individual TZM-bl cells from 3 independent experiments. Total number of cells analyzed per condition is indicated above each box. Results were analyzed by one-way ANOVA and Sidak post-hoc test \*\*\*\*  $p < 0.0001$ .

EM 500-550

EM 650-690

Merged

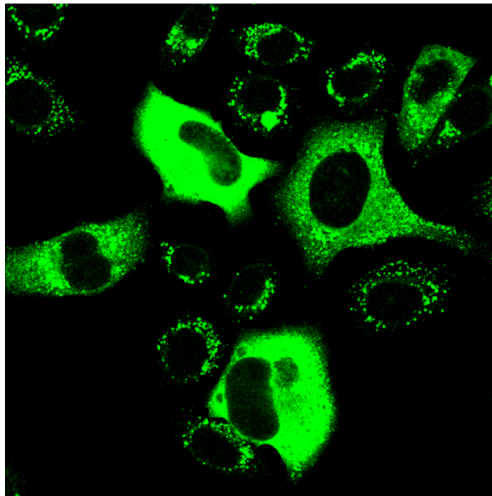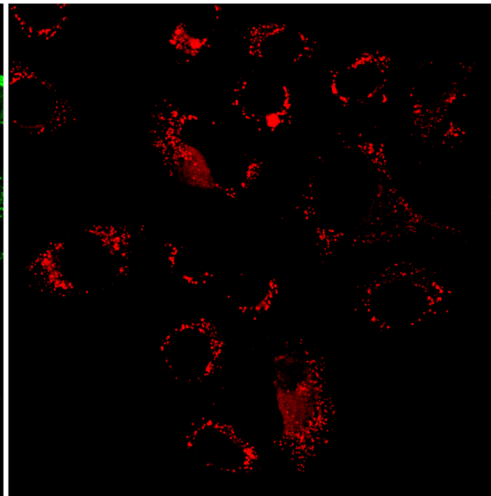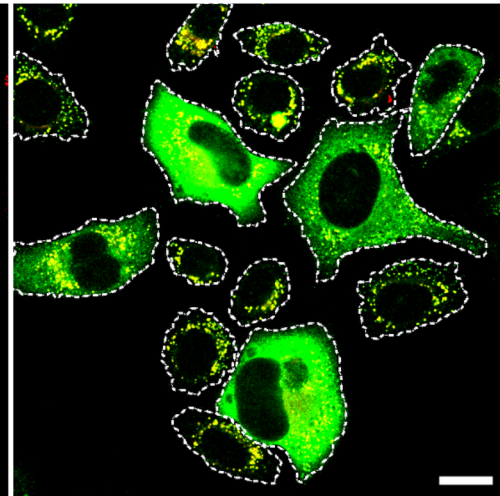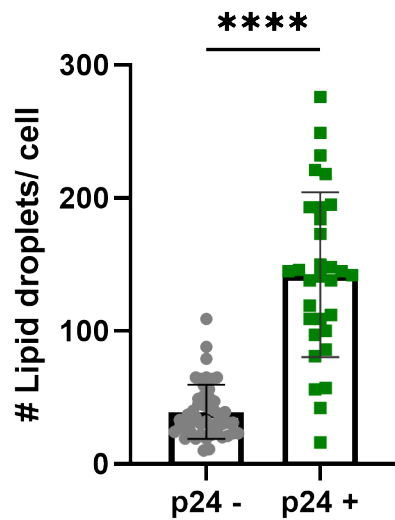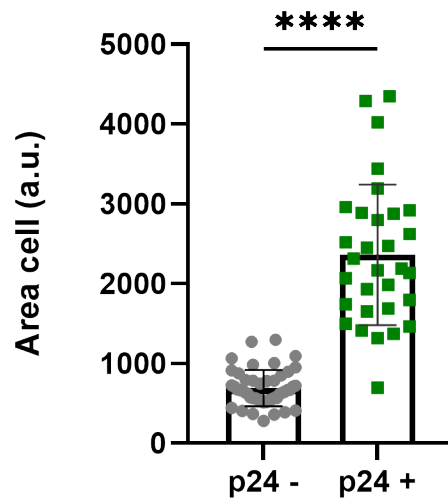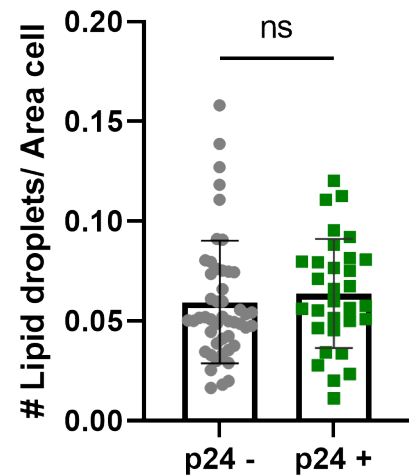

**Appendix Figure S4. Single-cell lipid droplet content in HIV-1 infected and uninfected TZM-bl cells.** Panel A) Micrograph showing TZM-bl cells expressing HIV-1 p24 3 days post-infection (Alexa 488 positive cells; emission 500 nm -550 nm, left column) and stained with Nile Red dye for lipid droplet detection (emission 650 nm – 690 nm, middle column). Merge of green and red channels is shown on the right column. Dashed lines indicate the cytoplasm contour of each cell. Scale bar = 20 $\mu$ m. Panels B-D) Scatter plots showing the comparative analysis of infected (A488 positive) vs non-infected cells (A488 negative) cells. Each dot represents the value obtained for a single cell. Bars represent the mean and error bars the standard deviation of at least 30 cells per condition. (B) Quantification of the absolute number of lipid droplets per cell. (C) Quantification of the size (area) of individual cells. (D) Quantification of the number of lipid droplets detected per cell normalized by the size of each cell. Results were analysed using unpaired t-test. \*\*\*\*  $p < 0.0001$ .

**A**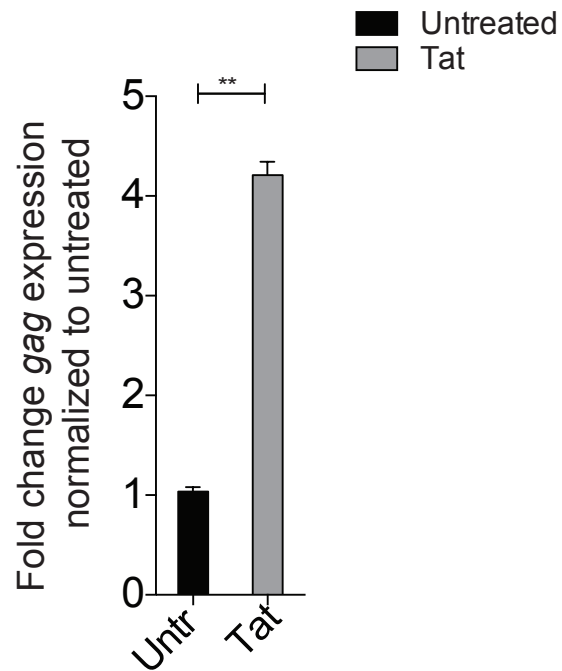

HIV-1 infected U1 cells

**B**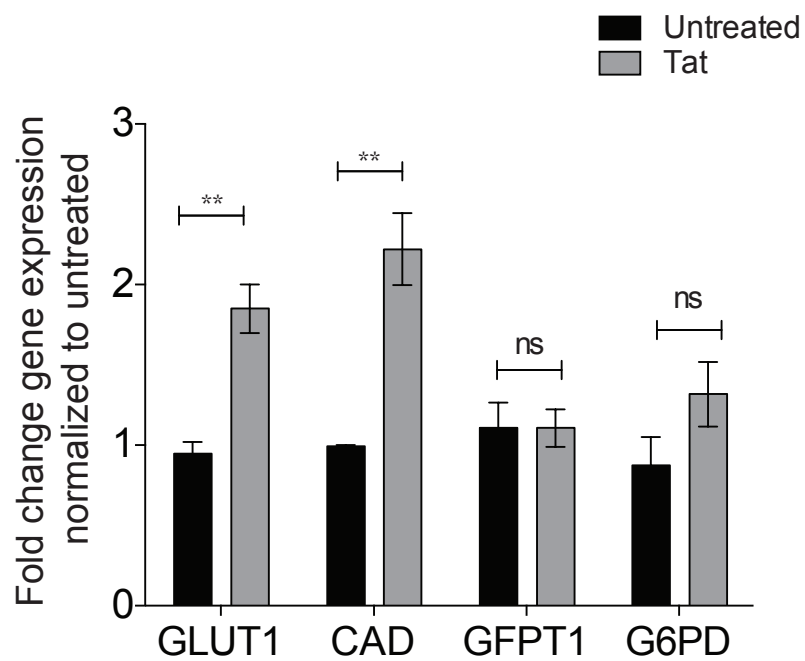

Uninfected U937 cells

**C**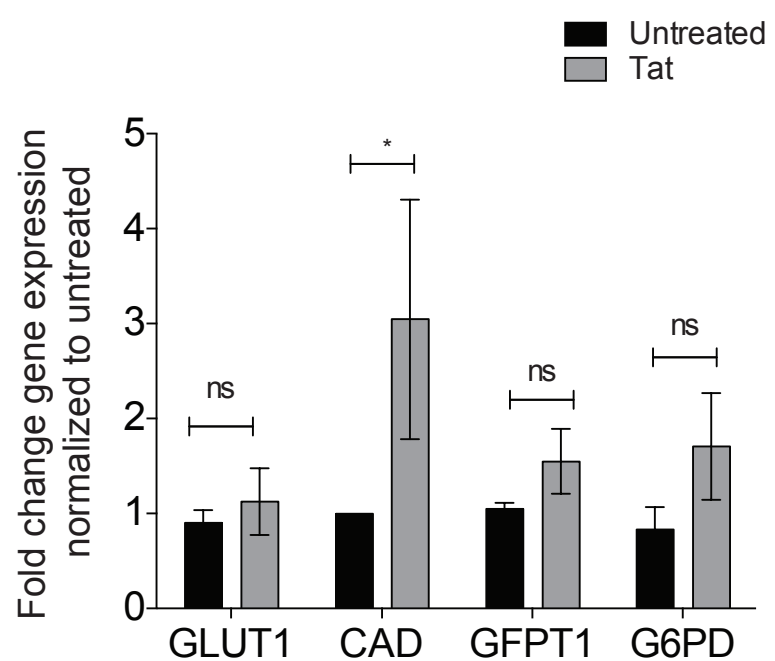

**Appendix Figure S5. Viro-metabolic effects of exogenous Tat administration in HIV-1 infected and uninfected cells.** The HIV-1 infected (U1, Panels A,B) and uninfected (U937, Panel C) cell lines, both deficient for Tat signaling, were left untreated or treated with HIV subtype-B Tat protein (800 ng/ml) for 72 h. Panel A. HIV-1 reactivation as measured by qPCR of *gag* expression in infected cells. Panels B,C. Expression of key metabolic genes of glycolysis (*GLUT1*), the pentose phosphate pathway (*G6PD*), pyrimidine biosynthesis/glutamate metabolism (*CAD*) and hexosamine biosynthesis/glutamate metabolism (*GFPT1*) as measured by qPCR in both infected (B) and uninfected cells (C). Fold change variations over the untreated control were calculated using the  $2^{-\Delta\Delta CT}$  method as in (Livak & Schmittgen, 2001). Results are expressed as mean  $\pm$  SD and are representative of data from two independent experiments (N=2). Results were analyzed by unpaired t-test with Welch's correction (A) or two-way ANOVA followed by Bonferroni's multiple comparison test (B,C). \* $p < 0.05$ ; \*\* $p < 0.01$ .

fold stress induction

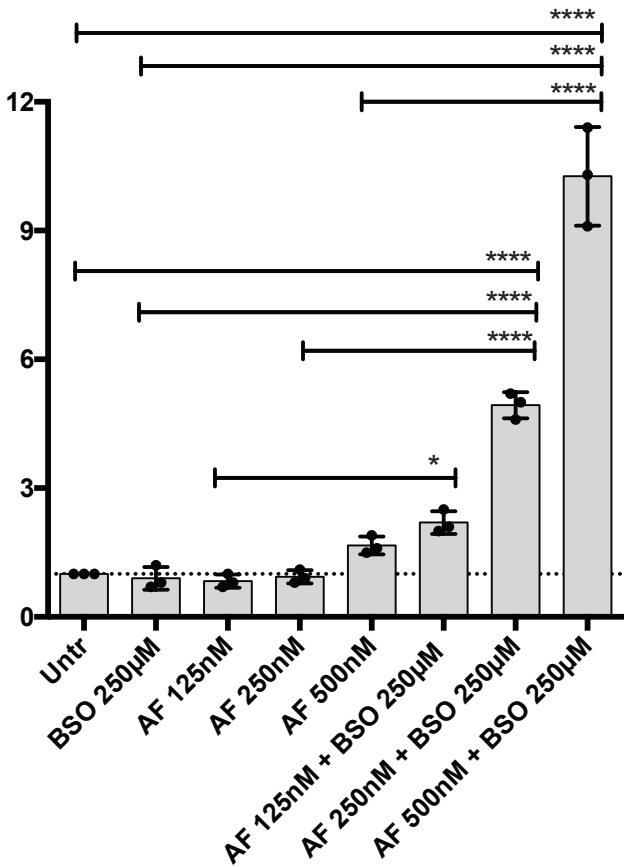

Appendix Figure S6

**Appendix Figure S6. Auranofin (AF) and buthionine sulfoximine (BSO) co-treatment induces synergistic oxidative stress in U1 cells.** U1 cells expressing the redox sensor Grx1-roGFP2 (Bhaskar *et al*, 2015) were exposed to various combinations of AF and/or BSO and the roGFP2 ratio (405/488 nm) was measured 24 h post-treatment. Fold change was calculated by dividing the roGFP2 ratios under treated conditions with the untreated cells. Data (mean  $\pm$  SD of three experiments) were analyzed by One Way ANOVA followed by Tukey's post-test (only comparisons between matching drug dosages are shown for simplicity's sake).

\*  $p < 0.05$ , \*\*\*\*  $p < 0.0001$ .



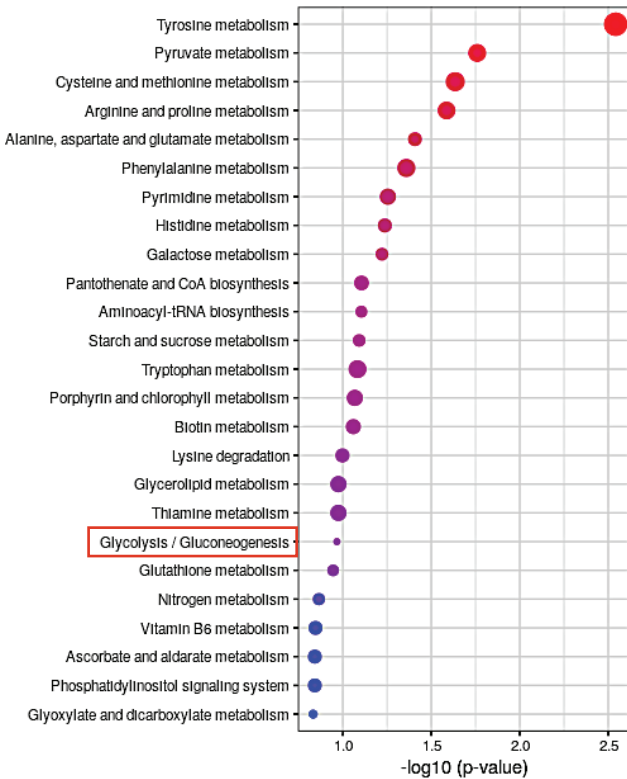

**AF + BSO vs AF**

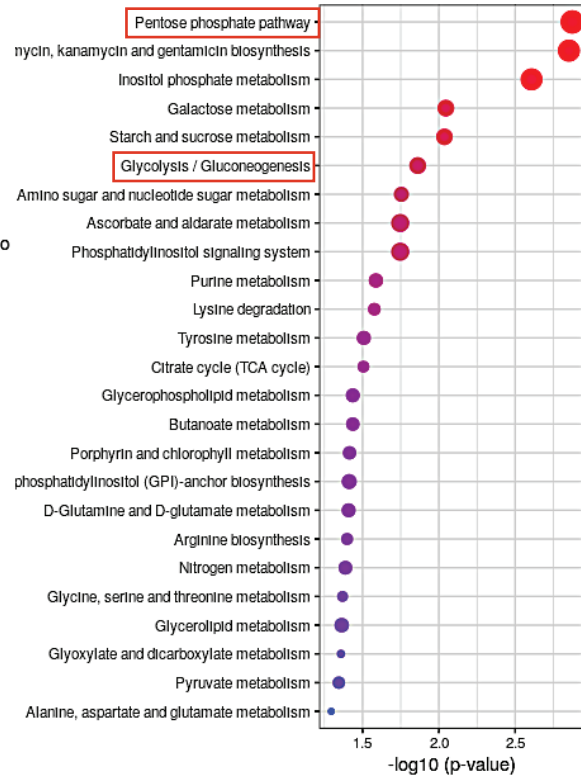

**AF + BSO vs BSO**

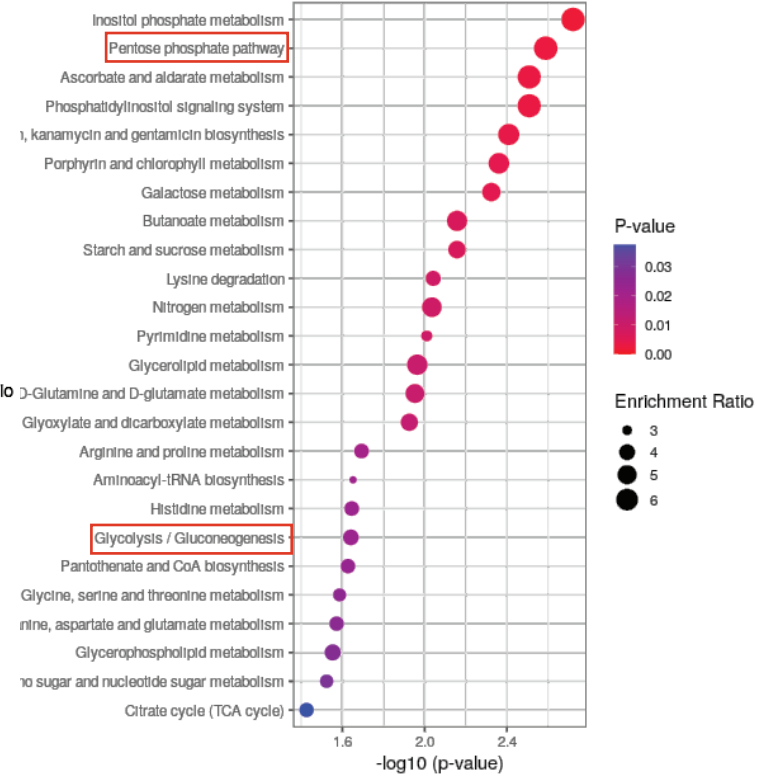

**AF vs BSO**

**Appendix Figure S7. Modulation of glycolytic metabolites in cells of PLWH treated with auranofin (AF) and/or buthionine sulfoximine (BSO).** Peripheral blood mononuclear cells (PBMC), isolated from total blood of PLWH, were treated with auranofin AF (500 nM), BSO (250  $\mu$ M) or a combination of the two, for 24 h. PBMC donors were selected from PLWH enrolled in trial NCT02961829 (Diaz *et al*, 2019). Cells were subjected to metabolomic analysis and the top enriched pathways were ordered according to p values obtained with Q statistics for metabolic datasets performed with Globaltest (MetaboAnalyst) (Xia *et al*, 2009). Number of donors = 6.

**A**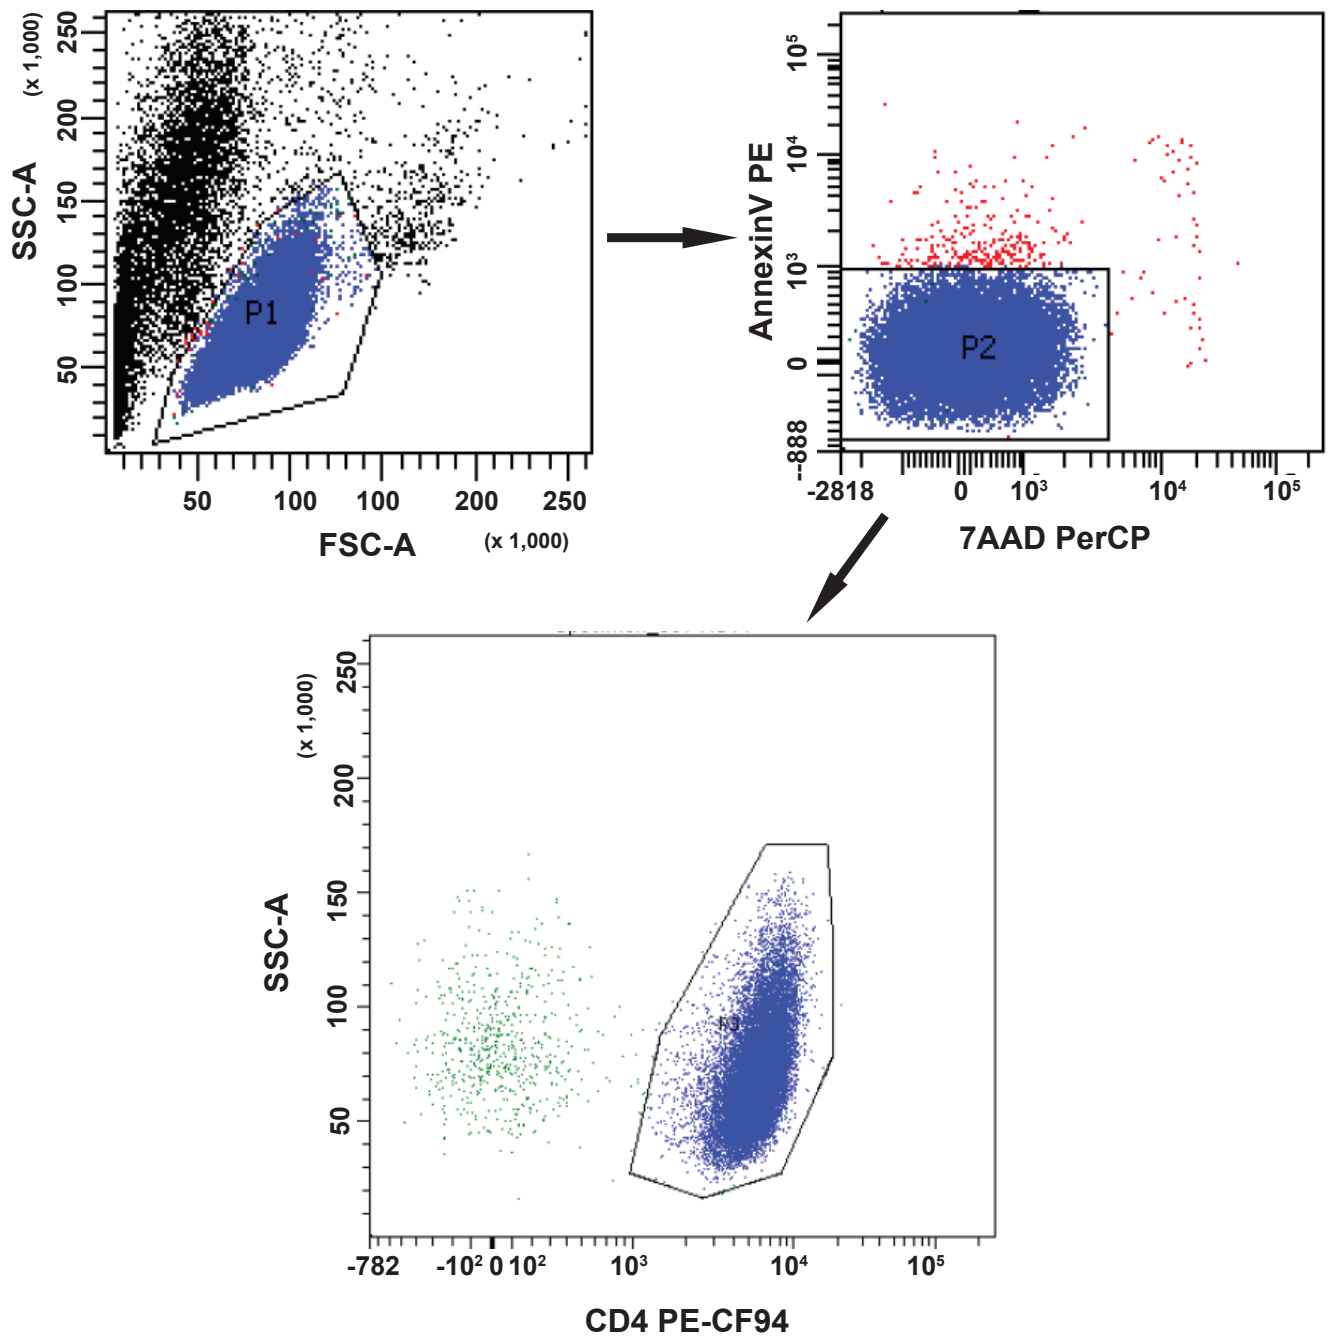**B**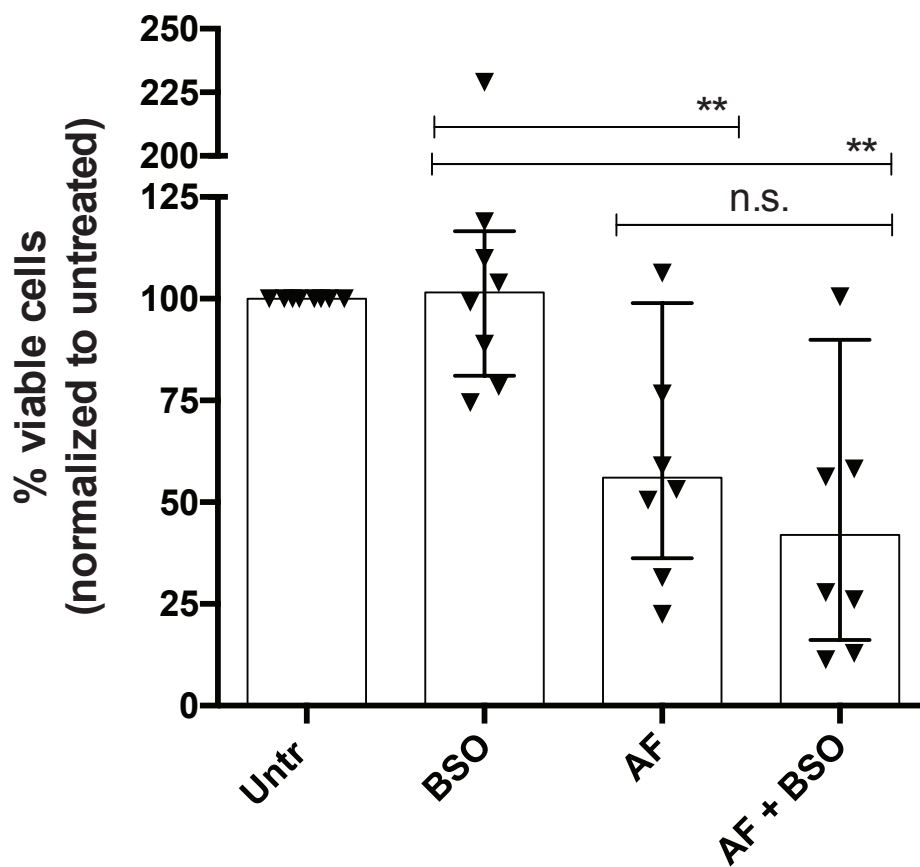

**Appendix Figure S8. Gating strategy and viability of CD4<sup>+</sup> T-cells of PLWH under ART left untreated or treated with auranofin (AF) and/or buthionine sulfoximine (BSO).** CD4<sup>+</sup> T-cells were treated with auranofin AF (500 nM), BSO (250  $\mu$ M) or a combination of the two, for 24 h. Viable CD4<sup>+</sup> T-cells were sorted according to the gating strategy shown in Panel A. Viability data are shown as mean  $\pm$  SD (Panel B). Data were analyzed by repeated measures one-way ANOVA followed by Tukey's post-test \*\*  $p < 0.01$ .

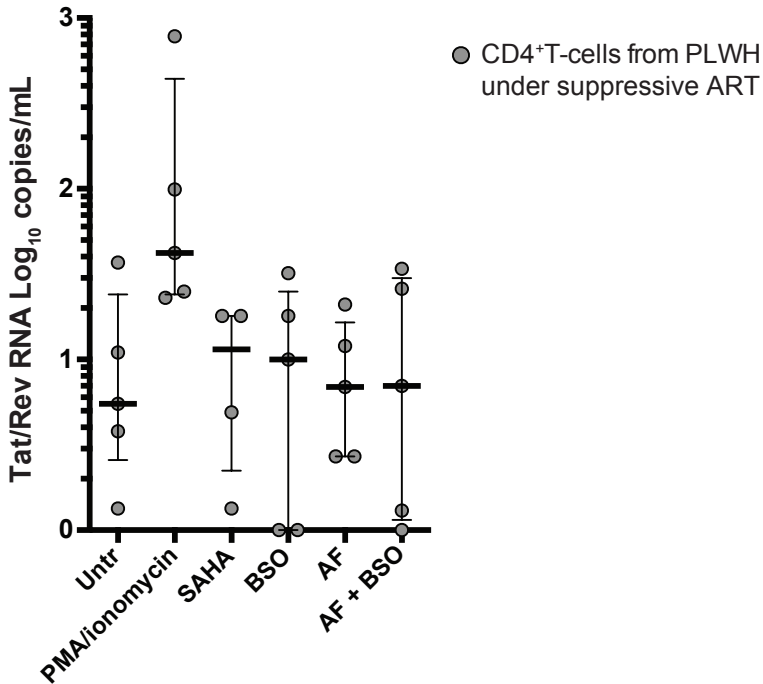

Appendix Figure S9

**Appendix Figure S9. HIV-1 reactivation in CD4<sup>+</sup> T-cells of PLWH under ART following treatment with auranofin (AF) and buthionine sulfoximine (BSO).** CD4<sup>+</sup> T-cells were isolated from total blood of PLWH under suppressive ART and left untreated or treated with AF (500 nM), BSO (250 μM) or a combination of the two for 48 h. Viral reactivation was measured by Tat/rev Induced Limiting Dilution Assay [TILDA (CD4<sup>+</sup> T-cells of PLWH)] (Procopio *et al*, 2015). Data are expressed as medians and interquartile ranges.
